# Supplementary material for: Tidal influence on carbon dioxide and methane fluxes from tree stems and soils in mangrove forests
Source: Copernicus journal article supplement (doi:10.5194/bg-21-5247-2024), 2024-11-26
Supplement: Supplementary file 1 [file bg-21-5247-2024-supplement.pdf]

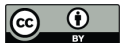

*Supplement of*

## **Tidal influence on carbon dioxide and methane fluxes from tree stems and soils in mangrove forests**

**Zhao-Jun Yong et al.**

*Correspondence to:* Hsing-Juh Lin ([hjlin@dragon.nchu.edu.tw](mailto:hjlin@dragon.nchu.edu.tw))

The copyright of individual parts of the supplement might differ from the article licence.

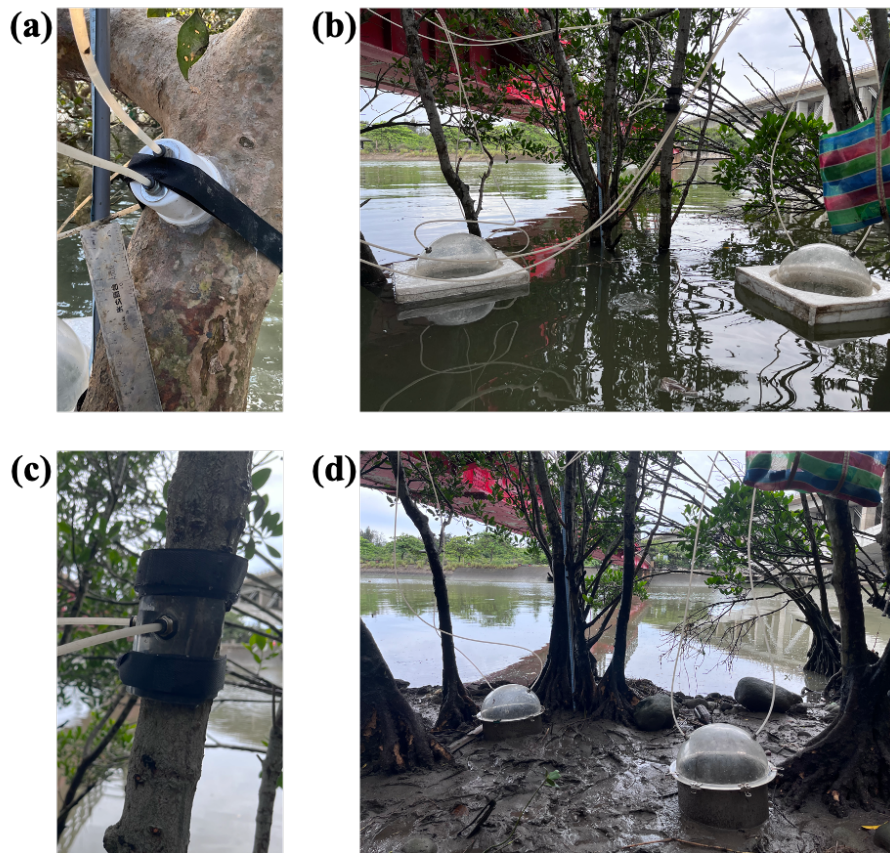

Figure S1. Photographs of flux measurement using tree stem chamber for (a) *Avicennia marina* and (b) *Kandelia obovata*, (c) floating chamber during tidal inundation and (d) soil chamber during low tide.
